# Supplementary material for: Transfer learning efficiently maps bone marrow cell types from mouse to human using single-cell RNA sequencing
Source: PubMed Central journal article supplement (PMC7718277; doi:10.1038/s42003-020-01463-6), 2020-12-04
Supplement: 42003_2020_1463_MOESM2_ESM.pdf [file 42003_2020_1463_MOESM2_ESM.pdf]

## Description of Additional Supplementary Files

**File Name:** Supplementary Data 1 - 4 (zip file)

**Description:** This .zip file contains the following Supplementary Data files:

**Supplementary Data 1:** Ranked list containing the top 100 features associated with each cell type, from sensitivity analysis of the multiclass logistic regression

**Supplementary Data 2:** Ranked list containing the top 100 features associated with each cell type, from sensitivity analysis of the artificial neural network

**Supplementary Data 3:** Results from Gene Ontology analysis of features listed in Supplementary Data 2

**Supplementary Data 4:** Results from Gene Ontology analysis of features listed in Supplementary Data 1
